# Supplementary material for: Alleviation of hyperglycaemia and oxidative stress by fruit extracts of different cultivars of the cornelian cherry (Cornus mas L. and Cornus mas × Cornus officinalis) in rats with diabetes mellitus
Source: Royal Society of Chemistry journal article supplement (doi:10.1039/d4fo05426a), 2025-01-01
Supplement: d4fo05426a1.pdf [file d4fo05426a1.pdf]

**Table S1** Content (g or mg per 100 g dw) of main compounds of extracts from *Cornus mas* of two cultivars ('Uholok' and 'Koralovyi') and mix of two Polish hybrids of *Cornus mas* × *Cornus officinalis* ('Jerzy' and 'Tomasz') by HPLC-PDA.

| Peak no.                                 | Compound                                | UV $\lambda_{\max}$ (nm) | Content                |                           |                                                          |
|------------------------------------------|-----------------------------------------|--------------------------|------------------------|---------------------------|----------------------------------------------------------|
|                                          |                                         |                          | <i>C. mas</i> 'Uholok' | <i>C. mas</i> 'Koralovyi' | <i>C. mas</i> × <i>C. officinalis</i> 'Jerzy' & 'Tomasz' |
| <b>IRIDOIDS (g/100 g dw)</b>             |                                         |                          |                        |                           |                                                          |
| 1                                        | Loganic acid                            | 245                      | 19.66±1.02             | 27.05±1.66                | 13.31±0.70                                               |
| 2                                        | Morroniside                             | 246                      |                        |                           | 10.06±0.37                                               |
| 3                                        | Loganin                                 | 245                      |                        | 2.39±0.27                 | 7.00±0.80                                                |
| 4                                        | Ir 1                                    | 245                      |                        |                           | 0.29±0.01                                                |
| 5                                        | Ir 2                                    | 244/277                  |                        |                           | 0.27±0.05                                                |
| 6                                        | Ir 3                                    | 246                      |                        |                           | 0.37±0.21                                                |
| 7                                        | Cornuside                               | 245/273                  | 1.81±0.12              | 2.26±0.17                 | 1.69±0.01                                                |
| <b>Total iridoids</b>                    |                                         |                          | <b>21.47</b>           | <b>31.70</b>              | <b>32.99</b>                                             |
| <b>HYDROLYSABLE TANNINS (g/100 g dw)</b> |                                         |                          |                        |                           |                                                          |
| 8                                        | T 1                                     | 279                      | 0.41±0.02              | 0.42±0.03                 | 0.27±0.00                                                |
| 9                                        | T 2                                     | 267                      | 0.82±0.04              | 1.25±0.13                 | 0.81±0.04                                                |
| 10                                       | T 3                                     | 278                      | 0.17±0.01              | 0.21±0.02                 |                                                          |
| 11                                       | T 4                                     | 270                      | 0.23±0.01              | 0.53±0.04                 | 0.41±0.00                                                |
| 12                                       | T 5                                     | 266                      | 0.42±0.02              | 0.63±0.05                 | 0.33±0.01                                                |
| 13                                       | T 6                                     | 269                      | 0.16±0.01              | 0.51±0.05                 | 0.19±0.00                                                |
| 14                                       | T 7                                     | 271                      | 0.36±0.02              | 0.98±0.08                 | 0.82±0.00                                                |
| 15                                       | T 8                                     | 271                      |                        |                           | 0.27±0.00                                                |
| 16                                       | T 9                                     | 267                      |                        | 0.28±0.06                 | 0.12±0.00                                                |
| 17                                       | T 10                                    | 265                      |                        |                           | 0.08±0.01                                                |
| 18                                       | T 11                                    | 274                      |                        |                           | 0.34±0.02                                                |
| 19                                       | T 12                                    | 270                      | 0.45±0.01              | 1.70±0.18                 | 1.77±0.04                                                |
| 20                                       | T 13                                    | 274                      | 0.39±0.01              |                           | 0.85±0.01                                                |
| 21                                       | T 14                                    | 278                      |                        | 0.38±0.06                 | 0.54±0.01                                                |
| 22                                       | T 15                                    | 277                      | 0.09±0.00              | 0.10±0.01                 | 0.38±0.03                                                |
| 23                                       | T 16                                    | 277                      |                        |                           | 0.27±0.08                                                |
| 24                                       | T 17                                    | 275                      |                        |                           | 0.12±0.05                                                |
| 25                                       | T 18                                    | 278                      | 0.07±0.00              | 0.17±0.02                 | 0.40±0.03                                                |
| 26                                       | T 19                                    | 278                      |                        |                           | 0.15±0.01                                                |
| 27                                       | T 20                                    | 276                      |                        |                           | 0.05±0.00                                                |
| 28                                       | T 21                                    | 265                      |                        |                           | 0.10±0.00                                                |
| 29                                       | T 22                                    | 279                      |                        |                           | 0.88±0.03                                                |
| <b>Total hydrolysable tannins</b>        |                                         |                          | <b>3.58</b>            | <b>7.17</b>               | <b>9.16</b>                                              |
| <b>ANTHOCYANINS (g/100 g dw)</b>         |                                         |                          |                        |                           |                                                          |
| 30                                       | Delphinidin 3- <i>O</i> -galactoside    | 524                      | 0.03±0.00              |                           | 0.03±0.00                                                |
| 31                                       | An                                      | 516                      |                        |                           | 0.01±0.00                                                |
| 32                                       | Cyanidin 3- <i>O</i> -galactoside       | 515                      | 4.83±0.29              | 0.04±0.01                 | 0.32±0.01                                                |
| 33                                       | Cyanidin 3- <i>O</i> -robinobioside     | 516                      | 1.99±0.13              |                           | 0.22±0.01                                                |
| 34                                       | Pelargonidin 3- <i>O</i> -galactoside   | 501                      | 2.12±0.15              | 0.22±0.03                 | 0.96±0.02                                                |
| 35                                       | Pelargonidin 3- <i>O</i> -robinobioside | 501                      | 0.18±0.02              |                           | 0.57±0.01                                                |
| 36                                       | Cyanidin                                | 523                      | 0.34±0.01              |                           |                                                          |
| 37                                       | Pelargonidin                            | 509                      | 0.14±0.03              | 0.01±0.00                 |                                                          |
| <b>Total anthocyanins</b>                |                                         |                          | <b>9.63</b>            | <b>0.27</b>               | <b>2.11</b>                                              |
| <b>FLAVONOLS (g/100 g dw)</b>            |                                         |                          |                        |                           |                                                          |
| 38                                       | Quercetin 3- <i>O</i> -glucuronide      | 257/354                  | 0.13±0.02              | 0.04±0.00                 | 0.37±0.01                                                |
| 39                                       | Kaempferol 3- <i>O</i> -galactoside     | 264/347                  | 0.21±0.01              | 0.50±0.05                 | 0.05±0.00                                                |
| <b>Total flavonols</b>                   |                                         |                          | <b>0.35</b>            | <b>0.55</b>               | <b>0.42</b>                                              |
| <b>PHENOLIC ACIDS (mg/100 g dw)</b>      |                                         |                          |                        |                           |                                                          |
| 40                                       | <i>trans</i> -Caftaric acid             | 326                      | 5.95±0.25              |                           | 2.15±0.07                                                |
| 41                                       | <i>p</i> -Coumaric acid derivative 1    | 309                      | 11.22±0.90             | 3.34±0.04                 |                                                          |
| 42                                       | <i>p</i> -Coumaric acid derivative 2    | 309                      | 4.91±0.15              | 13.65±1.26                |                                                          |
| 43                                       | Caffeoylquinic acid 1                   | 323                      |                        | 2.25±0.03                 | 0.95±0.00                                                |

|                             |                                       |     |               |               |               |
|-----------------------------|---------------------------------------|-----|---------------|---------------|---------------|
| 44                          | <i>cis</i> -caftaric acid             | 325 | 62.40±4.05    | 26.61±2.23    | 38.40±2.22    |
| 45                          | <i>p</i> -Coumaric acid derivative 3  | 314 |               | 2.95±0.02     |               |
| 46                          | <i>p</i> -Coumaric acid derivative 4  | 309 |               | 6.17±0.17     | 2.49±0.00     |
| 47                          | <i>cis</i> -coutaric acid             | 315 |               | 39.01±2.26    | 27.49±0.81    |
| 48                          | <i>p</i> -Coumaric acid               | 310 | 5.54±0.48     | 2.59±0.23     | 12.14±0.38    |
| 49                          | <i>p</i> -Coumaric acid derivative 5  | 310 | 6.00±0.51     |               |               |
| 50                          | <i>p</i> -Coumaric acid derivative 6  | 315 |               |               | 1.77±0.01     |
| 51                          | Ellagic acid                          | 254 | 10.57±0.80    | 28.00±0.00    | 37.14±1.15    |
| 52                          | <i>p</i> -Coumaric acid derivative 7  | 314 |               |               | 26.81±1.06    |
| 53                          | <i>p</i> -Coumaric acid derivative 8  | 311 |               |               | 3.93±0.07     |
| 54                          | <i>p</i> -Coumaric acid derivative 9  | 315 |               |               | 1.54±0.07     |
| 55                          | <i>p</i> -Coumaric acid derivative 10 | 315 |               |               | 1.33±0.03     |
| <b>Total phenolic acids</b> |                                       |     | <b>106.59</b> | <b>124.57</b> | <b>156.14</b> |

Ir, iridoid; T, hydrolysable tannin; An, anthocyanin.

**Table S2** The main compounds of extracts from *Cornus mas* of different cultivars ('Uholok', 'Koralovyi', 'Podolski', 'Yantarnyi' and 'Flava'), the hybrids of *C. mas* × *C. officinalis* ('Jerzy' and 'Tomasz' cultivars), and Loganic acid, a main iridoid glycoside extracted from yellow fruits of *C. mas* 'Yantarnyi' and 'Flava' cultivars\*

| Fruit extracts from                                     | <i>C. mas</i><br>'Uholok'<br>cultivar | <i>C. mas</i><br>'Koralovyi'<br>cultivar | <i>C. mas</i> ×<br><i>C. officinalis</i><br>'Jerzy' &<br>'Tomasz'<br>cultivars | <i>C. mas</i><br>'Podolski'<br>cultivar | <i>C. mas</i><br>'Yantarnyi' &<br>'Flava'<br>cultivars | Loganic<br>acid         |
|---------------------------------------------------------|---------------------------------------|------------------------------------------|--------------------------------------------------------------------------------|-----------------------------------------|--------------------------------------------------------|-------------------------|
| <b>IRIDOIDS</b>                                         |                                       |                                          |                                                                                |                                         |                                                        |                         |
| Loganic acid<br><i>Mean:</i>                            | +<br>19.66                            | +<br>27.05                               | +<br>13.31                                                                     | +<br>11.29 <sup>†</sup>                 | +<br>15.47                                             | +<br>73.99 <sup>§</sup> |
| Loganin<br><i>Mean:</i>                                 | –                                     | +<br>2.39                                | +<br>7.00 <sup>§</sup>                                                         | +<br>Trace <sup>†</sup>                 | +<br>0.98                                              | –                       |
| Cornuside<br><i>Mean:</i>                               | +<br>1.81                             | +<br>2.26                                | +<br>1.69 <sup>†</sup>                                                         | +<br>1.99                               | +<br>2.81 <sup>§</sup>                                 | –                       |
| Morroniside<br><i>Mean:</i>                             | –                                     | –                                        | +<br>10.06 <sup>§</sup>                                                        | –                                       | –                                                      | –                       |
| Sweroside<br><i>Mean:</i>                               | –                                     | –                                        | –                                                                              | +<br>0.55 <sup>†</sup>                  | +<br>0.61 <sup>§</sup>                                 | –                       |
| Secoxyloganin<br><i>Mean:</i>                           | –                                     | –                                        | –                                                                              | +<br>0.24 <sup>†</sup>                  | +<br>0.43 <sup>§</sup>                                 | –                       |
| <b>Total, g/100 g dw</b>                                | <b>21.47</b>                          | <b>31.70</b>                             | <b>32.06</b>                                                                   | <b>14.07</b>                            | <b>20.30</b>                                           | <b>73.99</b>            |
| <b>ANTHOCYANINS</b>                                     |                                       |                                          |                                                                                |                                         |                                                        |                         |
| Delphinidin 3- <i>O</i> -galactoside<br><i>Mean:</i>    | +<br>0.03                             | –                                        | +<br>0.03                                                                      | +<br>0.05 <sup>§</sup>                  | –                                                      | –                       |
| Cyanidin<br><i>Mean:</i>                                | +<br>0.34 <sup>§</sup>                | –                                        | –                                                                              | +<br>0.08 <sup>†</sup>                  | –                                                      | –                       |
| Cyanidin 3- <i>O</i> -galactoside<br><i>Mean:</i>       | +<br>4.83 <sup>§</sup>                | +<br>0.04 <sup>†</sup>                   | +<br>0.32                                                                      | +<br>0.76                               | –                                                      | –                       |
| Cyanidin 3- <i>O</i> -robinobioside<br><i>Mean:</i>     | +<br>1.99 <sup>§</sup>                | –                                        | +<br>0.22                                                                      | +<br>0.22                               | –                                                      | –                       |
| Pelargonidin<br><i>Mean:</i>                            | +<br>0.14 <sup>§</sup>                | +<br>0.01 <sup>†</sup>                   | –                                                                              | +<br>0.13                               | –                                                      | –                       |
| Pelargonidin 3- <i>O</i> -galactoside<br><i>Mean:</i>   | +<br>2.12 <sup>§</sup>                | +<br>0.22 <sup>†</sup>                   | +<br>0.96                                                                      | +<br>1.57                               | –                                                      | –                       |
| Pelargonidin 3- <i>O</i> -robinobioside<br><i>Mean:</i> | +<br>0.18 <sup>†</sup>                | –                                        | +<br>0.57 <sup>§</sup>                                                         | +<br>0.25                               | –                                                      | –                       |
| <b>Total, g/100 g dw</b>                                | <b>9.63</b>                           | <b>0.27</b>                              | <b>2.11</b>                                                                    | <b>3.06</b>                             | <b>0.00</b>                                            | <b>0.00</b>             |
| <b>FLAVONOLS</b>                                        |                                       |                                          |                                                                                |                                         |                                                        |                         |
| Quercetin 3- <i>O</i> -glucoside<br><i>Mean:</i>        | –                                     | –                                        | –                                                                              | +<br>0.02 <sup>†</sup>                  | +<br>0.03 <sup>§</sup>                                 | –                       |
| Quercetin 3- <i>O</i> -glucuronide<br><i>Mean:</i>      | +<br>0.13                             | +<br>0.04 <sup>†</sup>                   | +<br>0.37                                                                      | +<br>0.39                               | +<br>0.48 <sup>§</sup>                                 | –                       |
| Quercetin 3- <i>O</i> -galactoside<br><i>Mean:</i>      | –                                     | –                                        | –                                                                              | +<br>0.06 <sup>§</sup>                  | +<br>0.04 <sup>†</sup>                                 | –                       |
| Kaempferol 3- <i>O</i> -glucuronide<br><i>Mean:</i>     | –                                     | –                                        | –                                                                              | +<br>0.03 <sup>§</sup>                  | –                                                      | –                       |
| Kaempferol 3- <i>O</i> -galactoside<br><i>Mean:</i>     | +<br>0.21                             | +<br>0.50 <sup>§</sup>                   | +<br>0.05 <sup>†</sup>                                                         | +<br>0.23                               | –                                                      | –                       |
| <b>Total, g/100 g dw</b>                                | <b>0.34</b>                           | <b>0.54</b>                              | <b>0.42</b>                                                                    | <b>0.73</b>                             | <b>0.55</b>                                            | <b>0.00</b>             |
| <b>PHENOLIC ACIDS</b>                                   |                                       |                                          |                                                                                |                                         |                                                        |                         |
| Caftaric acid 1<br><i>Mean:</i>                         | –                                     | –                                        | –                                                                              | –                                       | –                                                      | +<br>0.722 <sup>§</sup> |

|                                                       |                         |                         |                         |                         |                         |                         |
|-------------------------------------------------------|-------------------------|-------------------------|-------------------------|-------------------------|-------------------------|-------------------------|
| Caftaric acid 2<br><i>Mean:</i>                       | –                       | –                       | –                       | –                       | –                       | +<br>1.110 <sup>§</sup> |
| <i>trans</i> -Caftaric acid<br><i>Mean:</i>           | +<br>0.006 <sup>§</sup> | –                       | +<br>0.002 <sup>†</sup> | –                       | –                       | –                       |
| <i>cis</i> -Caftaric acid<br><i>Mean:</i>             | +<br>0.062 <sup>§</sup> | +<br>0.027 <sup>†</sup> | +<br>0.038              | –                       | –                       | –                       |
| Caffeic acid<br><i>Mean:</i>                          | –                       | –                       | –                       | +<br>0.091 <sup>†</sup> | +<br>0.116 <sup>§</sup> | –                       |
| Caffeoylquinic acid 1<br><i>Mean:</i>                 | –                       | +<br>0.002              | +<br>0.001 <sup>†</sup> | +<br>0.585              | +<br>0.834 <sup>§</sup> | –                       |
| Caffeoylquinic acid 2<br><i>Mean:</i>                 | –                       | –                       | –                       | +<br>Trace <sup>†</sup> | +<br>0.014 <sup>§</sup> | –                       |
| Caffeoylhexoside 1<br><i>Mean:</i>                    | –                       | –                       | –                       | +<br>0.123 <sup>†</sup> | +<br>0.228 <sup>§</sup> | –                       |
| <i>p</i> -Coumaric acid<br><i>Mean:</i>               | +<br>0.005              | +<br>0.003 <sup>†</sup> | +<br>0.012              | +<br>0.009              | +<br>0.074 <sup>§</sup> | –                       |
| <i>p</i> -Coumaric acid derivative 1<br><i>Mean:</i>  | +<br>0.011 <sup>§</sup> | +<br>0.003 <sup>†</sup> | –                       | –                       | –                       | –                       |
| <i>p</i> -Coumaric acid derivative 2<br><i>Mean:</i>  | +<br>0.005 <sup>†</sup> | +<br>0.014 <sup>§</sup> | –                       | –                       | –                       | –                       |
| <i>p</i> -Coumaric acid derivative 3<br><i>Mean:</i>  | –                       | +<br>0.003 <sup>§</sup> | –                       | –                       | –                       | –                       |
| <i>p</i> -Coumaric acid derivative 4<br><i>Mean:</i>  | –                       | +<br>0.006 <sup>†</sup> | +<br>0.027 <sup>§</sup> | –                       | –                       | –                       |
| <i>p</i> -Coumaric acid derivative 5<br><i>Mean:</i>  | +<br>0.006 <sup>§</sup> | –                       | –                       | –                       | –                       | –                       |
| <i>p</i> -Coumaric acid derivative 6<br><i>Mean:</i>  | –                       | –                       | +<br>0.002 <sup>§</sup> | –                       | –                       | –                       |
| <i>p</i> -Coumaric acid derivative 7<br><i>Mean:</i>  | –                       | –                       | +<br>0.003 <sup>§</sup> | –                       | –                       | –                       |
| <i>p</i> -Coumaric acid derivative 8<br><i>Mean:</i>  | –                       | –                       | +<br>0.004 <sup>§</sup> | –                       | –                       | –                       |
| <i>p</i> -Coumaric acid derivative 9<br><i>Mean:</i>  | –                       | –                       | +<br>0.002 <sup>§</sup> | –                       | –                       | –                       |
| <i>p</i> -Coumaric acid derivative 10<br><i>Mean:</i> | –                       | –                       | +<br>0.001 <sup>§</sup> | –                       | –                       | –                       |
| <i>p</i> -Coumaroilquinic acid 1<br><i>Mean:</i>      | –                       | –                       | –                       | +<br>0.051 <sup>†</sup> | +<br>0.093 <sup>§</sup> | –                       |
| <i>p</i> -Coumaroilquinic acid 2<br><i>Mean:</i>      | –                       | –                       | –                       | +<br>0.302 <sup>†</sup> | +<br>0.702 <sup>§</sup> | –                       |
| <i>p</i> -Coumaroilquinic acid 3<br><i>Mean:</i>      | –                       | –                       | –                       | +<br>0.022 <sup>†</sup> | +<br>0.048 <sup>§</sup> | –                       |
| <i>cis</i> -Coutaric acid<br><i>Mean:</i>             | –                       | +<br>0.039 <sup>§</sup> | +<br>0.027 <sup>†</sup> | –                       | –                       | –                       |
| Ellagic acid<br><i>Mean:</i>                          | +<br>0.011 <sup>†</sup> | +<br>0.028              | +<br>0.037              | +<br>0.102 <sup>§</sup> | +<br>0.046              | –                       |
| <b>Total, g/100 g dw</b>                              | <b>0.106</b>            | <b>0.125</b>            | <b>0.156</b>            | <b>1.285</b>            | <b>2.155</b>            | <b>1.832</b>            |

§ – the highest content of this substance among studied extracts;

† – the lowest content of this substance among studied extracts;

\* – comparison of the qualitative and quantitative composition of the fruit extracts from 'Uholok' and 'Koralovyj' cultivars of *Cornus mas* and the hybrids of *C. mas* × *C. officinalis* was made based on Table S1, which is published in this article for the first time, and the results of the content of bioactive components of the extracts of red fruits of 'Podolski' cultivar and yellow fruits of 'Yantarnyi' & 'Flava' cultivars of cornelian cherry, and Loganic acid, published by Dzydzan *et al.* (2019, 2020).<sup>12,13</sup>
